# Supplementary material
Source: HighWire-hosted journal article supplement (https://jnm.snmjournals.org/highwire/filestream/94865/field_highwire_adjunct_files/0/167338_Supplemental_Data.pdf)
Supplement: 167338_Supplemental_Data.pdf [file 167338_Supplemental_Data.pdf]

**Supplemental Table 1.** The number of patients recruited from the participating seven hospitals.

|            | Total | Enrolled in the present study |
|------------|-------|-------------------------------|
| Hospital 1 | 50    | 15                            |
| Hospital 2 | 66    | 29                            |
| Hospital 3 | 29    | 5                             |
| Hospital 4 | 235   | 41                            |
| Hospital 5 | 169   | 28                            |
| Hospital 6 | 5     | 2                             |
| Hospital 7 | 293   | 94                            |
| Total      | 847   | 214                           |
